# Supplementary material
Source: PubMed Central journal article supplement (PMC2937732)
Supplement: supp_48_9_3397__1.pdf [file supp_48_9_3397__1.pdf]

## Supplementary Material

Keller et al. 2010. J. Clin. Microbiol. Vol. 48, No. 9.: Recognition of Potentially Novel Human Disease-associated Pathogens by Implementation of Systematic 16S rRNA Gene Sequencing in the Diagnostic Laboratory.

SUPPLEMENTARY TABLE 1. Isolates with 16S rRNA homology < 99% to accepted species (n = 60)

| Analysis date | NCBI GenBank accession no. | IMM number | 16S rRNA based identification             | Match with highest % homology            | Sequence length (bp) | Homology of 1 <sup>st</sup> match |       |                   | Match with second highest % homology    | Homology of 2 <sup>nd</sup> match |      |                   |
|---------------|----------------------------|------------|-------------------------------------------|------------------------------------------|----------------------|-----------------------------------|-------|-------------------|-----------------------------------------|-----------------------------------|------|-------------------|
|               |                            |            |                                           |                                          |                      | No of mismatches                  | %     | Match length (bp) |                                         | No of mismatches                  | %    | Match length (bp) |
| 20071224      | GU797892                   | 316398/07  | <i>Acinetobacter septicus</i>             | <i>Acinetobacter septicus</i>            | 531                  | 0                                 | 100.0 | 531               | <i>Acinetobacter ursingii</i>           | 7                                 | 98.6 | 500               |
| 20050517      | GU797842                   | 270/05     | <i>Acinetobacter</i> sp.                  | <i>Acinetobacter johnsonii</i>           | 537                  | 13                                | 97.5  | 526               | <i>Acinetobacter junii</i>              | 22                                | 95.8 | 519               |
| 20040827      | GU797845                   | 2293/04    | <i>Acinetobacter</i> sp.                  | <i>Acinetobacter calcoaceticus</i>       | 574                  | 10                                | 98.3  | 574               | <i>Acinetobacter johnsonii</i>          | 11                                | 98.1 | 574               |
| 20051021      | GU797861                   | 127266/05  | <i>Actinobaculum</i> sp.                  | <i>Actinobaculum schaalii</i>            | 574                  | 21                                | 95.8  | 496               | <i>Arcanobacterium pluranimalium</i>    | 61                                | 89.2 | 567               |
| 20080811      | GU797883                   | 316321/08  | <i>Actinobaculum</i> sp.                  | <i>Actinobaculum schaalii</i>            | 771                  | 26                                | 96.6  | 768               | <i>Actinobaculum urinale</i>            | 65                                | 91.6 | 771               |
| 20080111      | GU797867                   | 316014/08  | <i>Actinobaculum</i> sp.                  | <i>Actinobaculum schaalii</i>            | 576                  | 13                                | 97.7  | 577               | <i>Actinobaculum massiliae</i>          | 16                                | 95.8 | 385               |
| 20080402      | GU797872                   | 316128/08  | <i>Actinobaculum</i> sp.                  | <i>Actinobaculum schaalii</i>            | 651                  | 10                                | 98.4  | 641               | <i>Actinobaculum urinale</i>            | 63                                | 90.4 | 655               |
| 20080929      | GU797891                   | 316395/08  | <i>Actinomyces</i> sp.                    | <i>Actinomyces naeslundii</i>            | 568                  | 15                                | 97.4  | 573               | <i>Actinomyces viscosus</i>             | 32                                | 94.5 | 580               |
| 20040804      | GU797844                   | 2234/04    | <i>Actinomyces</i> sp.                    | <i>Actinomyces turicensis</i>            | 546                  | 7                                 | 98.7  | 541               | <i>Actinomyces odontolyticus</i>        | 23                                | 95.8 | 547               |
| 20071011      | GU797884                   | 316330/07  | <i>Actinomyces</i> sp.                    | <i>Actinomyces odontolyticus</i>         | 504                  | 17                                | 96.6  | 496               | <i>Actinomyces meyeri</i>               | 26                                | 94.8 | 502               |
| 20041027      | GU797850                   | 3417/04    | <i>Aerococcus</i> sp.                     | <i>Aerococcus viridans</i>               | 785                  | 3                                 | 99.6  | 694               | <i>Aerococcus urinaequi</i>             | 5                                 | 99.3 | 762               |
| 20071119      | GU797887                   | 316364/07  | <i>Aggregatibacter</i> sp.                | <i>Aggregatibacter segnis</i>            | 637                  | 12                                | 98.1  | 637               | <i>Aggregatibacter aphrophilus</i>      | 28                                | 95.6 | 635               |
| 20061228      | GU797834                   | 316503/06  | <i>Aquabacterium</i> sp.                  | <i>Aquabacterium hongkongensis</i>       | 472                  | 15                                | 96.7  | 453               | <i>Roseateles depolymerans</i>          | 27                                | 94.3 | 472               |
| 20060130      | GU797856                   | 126279/06  | <i>Aquabacterium</i> sp.                  | <i>Aquabacterium fontiphilum</i>         | 413                  | 7                                 | 98.2  | 390               | <i>Roseateles depolymerans</i>          | 20                                | 95.2 | 413               |
| 20051128      | GU797863                   | 127700/05  | <i>Aquabacterium</i> sp.                  | <i>Aquabacterium citratiphilum</i>       | 520                  | 22                                | 95.8  | 520               | <i>Methylthium subsaxonicum</i>         | 26                                | 95.0 | 520               |
| 20060509      | GU797871                   | 316114/06  | <i>Brachybacterium</i> sp.                | <i>Brachybacterium rhamnorum</i>         | 566                  | 18                                | 96.0  | 454               | <i>Brachybacterium alimentarium</i>     | 21                                | 95.4 | 454               |
| 20071029      | GU797885                   | 316347/07  | <i>Brevibacteriaceae</i> family bacterium | <i>Leucobacter tardus</i>                | 735                  | 57                                | 92.2  | 734               | <i>Rathayibacter iranicus</i>           | 58                                | 85.5 | 399               |
| 20050208      | GU797837                   | 70/05      | <i>Brevibacterium ravenburgense</i>       | <i>Brevibacterium ravenburgense</i>      | 580                  | 3                                 | 99.5  | 579               | <i>Arthrobacter cummingsii</i>          | 28                                | 94.9 | 550               |
| 20071122      | GU797888                   | 316373/07  | <i>Burkholderiales</i> order bacterium    | <i>Suterella stercoricanis</i>           | 531                  | 54                                | 89.8  | 530               | <i>Schlegelella thermodepolymerans</i>  | 57                                | 89.3 | 531               |
| 20070622      | GU797876                   | 316221/07  | <i>Campylobacter ureolyticus</i>          | <i>Campylobacter ureolyticus</i>         | 519                  | 1                                 | 99.8  | 519               | <i>Campylobacter jejuni</i>             | 33                                | 93.7 | 522               |
| 20080107      | GU797865                   | 316002/08  | <i>Clostridium</i> sp.                    | <i>Clostridium botleae</i>               | 531                  | 15                                | 97.2  | 530               | <i>Clostridium clostridioforme</i>      | 17                                | 96.8 | 529               |
| 20040929      | GU797847                   | 3008/04    | <i>Collinsella</i> sp.                    | <i>Collinsella aerofaciens</i>           | 491                  | 9                                 | 98.2  | 489               | <i>Collinsella stercoris</i>            | 30                                | 93.9 | 490               |
| 20050308      | GU797839                   | 126/05     | <i>Corynebacterium freiburgense</i>       | <i>Corynebacterium freiburgense</i>      | 595                  | 0                                 | 100.0 | 595               | <i>Corynebacterium acetacidophilum</i>  | 12                                | 97.8 | 549               |
| 20081223      | GU797833                   | 316505/08  | <i>Corynebacterium massiliense</i>        | <i>Corynebacterium massiliense</i>       | 555                  | 1                                 | 99.8  | 556               | <i>Corynebacterium confusum</i>         | 16                                | 97.1 | 556               |
| 20080812      | GU797881                   | 316309/08  | <i>Corynebacterium pyruviciproducens</i>  | <i>Corynebacterium pyruviciproducens</i> | 745                  | 0                                 | 100.0 | 745               | <i>Corynebacterium glucuronolyticum</i> | 20                                | 97.3 | 745               |
| 20051207      | GU797864                   | 127894/05  | <i>Corynebacterium massiliense</i>        | <i>Corynebacterium massiliense</i>       | 409                  | 1                                 | 99.8  | 409               | <i>Corynebacterium confusum</i>         | 12                                | 97.1 | 409               |
| 20051005      | GU797860                   | 127112/05  | <i>Corynebacterium</i> sp.                | <i>Corynebacterium ureicelerivorans</i>  | 537                  | 10                                | 98.1  | 532               | <i>Corynebacterium afermentans</i>      | 12                                | 97.8 | 538               |
| 20070110      | GU797866                   | 316003/07  | <i>Corynebacterium mastitidis</i>         | <i>Corynebacterium mastitidis</i>        | 463                  | 0                                 | 100.0 | 463               | <i>Corynebacterium segmentosum</i>      | 28                                | 94.0 | 464               |
| 20060802      | GU797878                   | 316252/06  | <i>Corynebacterium ureicelerivorans</i>   | <i>Corynebacterium ureicelerivorans</i>  | 736                  | 3                                 | 99.6  | 736               | <i>Corynebacterium mucifaciens</i>      | 10                                | 98.6 | 736               |
| 20050712      | GU797853                   | 126136/05  | <i>Facklamia</i> sp.                      | <i>Facklamia hominis</i>                 | 598                  | 9                                 | 98.5  | 597               | <i>Facklamia languida</i>               | 26                                | 95.6 | 596               |
| 20041006      | GU797848                   | 3019/04    | <i>Fusobacterium</i> sp.                  | <i>Fusobacterium nucleatum</i>           | 626                  | 26                                | 95.8  | 626               | <i>Fusobacterium periodonticum</i>      | 25                                | 96.0 | 626               |
| 20060201      | GU797857                   | 126303/04  | <i>Gardnerella</i> sp.                    | <i>Gardnerella vaginalis</i>             | 527                  | 6                                 | 98.9  | 527               | <i>Bifidobacterium psychraerophilum</i> | 50                                | 90.5 | 527               |
| 20050110      | GU797835                   | 20/05      | <i>Kineospaera</i> sp.                    | <i>Kineospaera limosa</i>                | 570                  | 24                                | 95.6  | 549               | <i>Dermatophilus crocodyli</i>          | 32                                | 94.2 | 551               |
| 20041221      | GU797852                   | 3961/05    | <i>Kocuria</i> sp.                        | <i>Kocuria marina</i>                    | 698                  | 26                                | 96.1  | 668               | <i>Kocuria rhizophila</i>               | 39                                | 94.4 | 698               |
| 20051026      | GU797862                   | 127283/05  | <i>Kocuria</i> sp.                        | <i>Kocuria kristinae</i>                 | 581                  | 20                                | 96.6  | 581               | <i>Kocuria rosea</i>                    | 21                                | 96.4 | 583               |
| 20080922      | GU797890                   | 316386/08  | <i>Leptotrichia</i> sp.                   | <i>Leptotrichia buccalis</i>             | 568                  | 7                                 | 98.8  | 568               | <i>Leptotrichia hofstadii</i>           | 13                                | 97.7 | 568               |
| 20080708      | GU797879                   | 316252/08  | <i>Mogibacterium</i> sp.                  | <i>Mogibacterium timidum</i>             | 538                  | 7                                 | 98.7  | 538               | <i>Mogibacterium vesicum</i>            | 18                                | 96.6 | 537               |

SUPPLEMENTARY TABLE 1. Continued

| Analysis date | NCBI GenBank accession | IMM number | 16S rRNA based identification           | Match with highest % homology     | Sequence length (bp) | Homology of 1 <sup>st</sup> match |       |                   | Match with second highest % homology | Homology of 2 <sup>nd</sup> match |      |                   |
|---------------|------------------------|------------|-----------------------------------------|-----------------------------------|----------------------|-----------------------------------|-------|-------------------|--------------------------------------|-----------------------------------|------|-------------------|
|               |                        |            |                                         |                                   |                      | No of mismatches                  | %     | Match length (bp) |                                      | No of mismatches                  | %    | Match length (bp) |
| 20041008      | GU797849               | 3033/04    | <i>Neisseria zoodegmatidis</i>          | <i>Neisseria zoodegmatidis</i>    | 523                  | 3                                 | 99.4  | 525               | <i>Neisseria waeverii</i>            | 20                                | 96.1 | 517               |
| 20040827      | GU797846               | 2297/04    | <i>Nocardia</i> sp.                     | <i>Nocardia farcinica</i>         | 420                  | 7                                 | 98.3  | 420               | <i>Nocardia ottitidiscaviarum</i>    | 7                                 | 98.3 | 420               |
| 20070502      | GU797874               | 316161/07  | <i>Nocardia</i> sp.                     | <i>Nocardia flavorosea</i>        | 494                  | 8                                 | 98.4  | 494               | <i>Nocardia paucivorans</i>          | 14                                | 97.2 | 494               |
| 20060227      | GU797858               | 126561/06  | <i>Nocardia</i> sp.                     | <i>Nocardia asteroides</i>        | 523                  | 6                                 | 98.9  | 523               | <i>Nocardia vinacea</i>              | 7                                 | 98.7 | 523               |
| 20080513      | GU797875               | 316178/08  | Paenibacillaceae family bacterium       | <i>Paenicillus contaminans</i>    | 580                  | 51                                | 90.7  | 551               | <i>Paenibacillus humicus</i>         | 57                                | 90.2 | 581               |
| 20060927      | GU797886               | 316349/06  | Paenibacillaceae family bacterium       | <i>Paenibacillus humicus</i>      | 523                  | 46                                | 91.3  | 526               | <i>Paenibacillus contaminans</i>     | 52                                | 89.9 | 516               |
| 20070117      | GU797868               | 316015/07  | Paenibacillaceae family bacterium       | <i>Paenibacillus validus</i>      | 488                  | 36                                | 92.6  | 487               | <i>Paenibacillus terrigena</i>       | 38                                | 92.2 | 490               |
| 20070206      | GU797869               | 316052/07  | Paenibacillaceae family bacterium       | <i>Paenibacillus chinjuensis</i>  | 481                  | 34                                | 92.9  | 480               | <i>Paenibacillus soli</i>            | 34                                | 92.9 | 482               |
| 20060907      | GU797882               | 316316/06  | Paenibacillaceae family bacterium       | <i>Paenibacillus validus</i>      | 496                  | 32                                | 93.5  | 493               | <i>Paenibacillus chinjuensis</i>     | 34                                | 93.2 | 497               |
| 20080307      | GU797870               | 316111/08  | Paenibacillaceae family bacterium       | <i>Paenibacillus pocheonensis</i> | 585                  | 35                                | 93.8  | 563               | <i>Paenibacillus validus</i>         | 35                                | 93.7 | 558               |
| 20050221      | GU797838               | 94/05      | <i>Paenibacillus barengoltzii</i>       | <i>Paenibacillus barengoltzii</i> | 521                  | 0                                 | 100.0 | 521               | <i>Paenibacillus timonensis</i>      | 14                                | 97.3 | 521               |
| 20071123      | GU797889               | 316374/07  | Peptostreptococcaceae family bacterium  | <i>Anaerococcus octavius</i>      | 530                  | 28                                | 94.7  | 530               | <i>Anaerococcus vaginalis</i>        | 38                                | 92.6 | 512               |
| 20060809      | GU797880               | 316269/06  | <i>Propioniferax</i> sp.                | <i>Propioniferax innocua</i>      | 750                  | 27                                | 96.3  | 720               | <i>Microlunatus panaciterrae</i>     | 64                                | 91.5 | 750               |
| 20050722      | GU797855               | 126272/05  | <i>Pseudomonas</i> sp.                  | <i>Pseudomonas fulva</i>          | 526                  | 10                                | 98.1  | 526               | <i>Pseudomonas argentinensis</i>     | 10                                | 98.1 | 526               |
| 20050114      | GU797836               | 26/05      | <i>Roseomonas</i> sp.                   | <i>Roseomonas mucosa</i>          | 327                  | 5                                 | 98.5  | 327               | <i>Roseomonas gilardii</i>           | 12                                | 96.3 | 327               |
| 20081218      | GU797893               | 316498/08  | <i>Ruminococcus</i> sp.                 | <i>Ruminococcus obeum</i>         | 542                  | 22                                | 95.9  | 539               | <i>Ruminococcus schinkii</i>         | 37                                | 93.2 | 544               |
| 20050213      | GU797841               | 187/08     | <i>Streptococcus</i> sp.                | <i>Streptococcus oralis</i>       | 471                  | 18                                | 96.1  | 463               | <i>Streptococcus mitis</i>           | 19                                | 95.9 | 465               |
| 20080616      | GU797877               | 316221/08  | <i>Streptococcus</i> sp.                | <i>Streptococcus mitis</i>        | 392                  | 10                                | 97.4  | 392               | <i>Streptococcus cristatus</i>       | 13                                | 96.7 | 392               |
| 20050309      | GU797840               | 130/05     | <i>Streptococcus</i> sp.                | <i>Streptococcus oralis</i>       | 435                  | 9                                 | 97.8  | 403               | <i>Streptococcus oralis</i>          | 9                                 | 97.8 | 403               |
| 20050912      | GU797859               | 126831/05  | <i>Streptococcus</i> sp.                | <i>Streptococcus constellatus</i> | 571                  | 8                                 | 98.6  | 571               | <i>Streptococcus anginosus</i>       | 8                                 | 98.6 | 571               |
| 20060605      | GU797873               | 316152/06  | <i>Streptococcus</i> sp.                | <i>Streptococcus infantis</i>     | 636                  | 7                                 | 98.9  | 631               | <i>Streptococcus oralis</i>          | 8                                 | 98.7 | 632               |
| 20040611      | GU797843               | 2056/04    | <i>Streptomyces</i> sp.                 | <i>Streptomyces hygroscopicus</i> | 636                  | 10                                | 98.4  | 628               | <i>Streptomyces violaceusniger</i>   | 10                                | 98.4 | 623               |
| 20041028      | GU797851               | 3527/04    | Thermoanaerobacteriales order bacterium | <i>Moorella thermoacetica</i>     | 505                  | 88                                | 80.3  | 446               | <i>Moorella thermoautotrophica</i>   | 91                                | 79.5 | 444               |

SUPPLEMENTARY TABLE 2. Database items used for the clinical score

|                                                             |                                   |
|-------------------------------------------------------------|-----------------------------------|
| <b>Sample information</b>                                   |                                   |
| Case number University Hospital Zurich                      | nnnnnnnn                          |
| Birth date                                                  | DD/MM/YYYY                        |
| Dept., ward                                                 | Dept., Ward                       |
| Case number Institute of Medical Microbiology               | nnnnnnnn                          |
| Clinical diagnosis (when PCR sample was taken)              | Text                              |
| Underlying disease                                          | Text                              |
| Discharge diagnosis                                         | Text                              |
| Consultation of Infectious Diseases Dept.                   | YES/NO                            |
| <b>Infection</b>                                            |                                   |
| Clinical findings                                           |                                   |
| Clinical infection (clinical signs & symptoms of infection) | YES/NO                            |
| Fever (according Crit. Care Med. 37 [7 Suppl]: S273–8)      | YES/NO                            |
| Laboratory                                                  |                                   |
| CRP (mg/L)                                                  | Value                             |
| Procalcitonin (ng/mL)                                       | Value                             |
| Leucocytes (10 <sup>3</sup> cells/mL)                       | Value                             |
| Additional diagnostic procedures                            |                                   |
| Imaging studies                                             | YES/NO, text [condensed report]   |
| Pathology                                                   | YES/NO, text [condensed report]   |
| Serology                                                    | YES/NO, text [condensed report]   |
| Various                                                     | Text [condensed reports]          |
| <b>Microbiology laboratory</b>                              |                                   |
| 16S rRNA gene broad-spectrum PCR                            |                                   |
| PCR: Request date                                           | DD/MM/YYYY                        |
| PCR: Result date                                            | DD/MM/YYYY                        |
| PCR: Pathogen identification (1 <sup>st</sup> match)        | Species name                      |
| PCR: Sequence (bp)                                          | Value                             |
| PCR: Mismatches (bp/match length)                           | Value                             |
| PCR: Homology of 1 <sup>st</sup> match (%)                  | Value                             |
| PCR: Homology of 2 <sup>nd</sup> match (%)                  | Value                             |
| PCR: Material type                                          | Text                              |
| Patient: Sampling site (body site)                          | Text                              |
| Microscopy: Bacteria in Gram stain                          | Value [quantity per visual field] |
| Microscopy: Leucocytes in Gram stain                        | Value [quantity per visual field] |
| Culture: Pathogen, identification                           | Species name                      |
| Culture: Pathogen, quantity                                 | Value [quantity]                  |
| Microbial examinations, other body sites                    |                                   |
| Pathogen (most likely, combined result)                     | Species name(s)                   |
| Material                                                    | Text                              |
| Sampling date                                               | DD/MM/YYYY                        |
| <b>Therapy</b>                                              |                                   |
| Antibiotic therapy                                          | YES/NO                            |
| Antibiotic therapy: Regimen                                 | Text [substance, dosage]          |
| Antibiotic therapy: Start date                              | DD/MM/YYYY                        |
| Adaption of antibiotic regimen following PCR result         | YES/NO                            |
| Adaption: Kind of adaption                                  | Text                              |
| Adaption: Date                                              | DD/MM/YYYY                        |
| <b>Clinical Relevance</b>                                   |                                   |
| Relevance of the pathogen identified in PCR                 | <b>YES/NO</b>                     |
| Relevance of PCR result                                     | YES/NO                            |
